# Supplementary material for: Evolutionary patterns of metazoan microRNAs reveal targeting principles in the let-7 and miR-10 families
Source: HighWire-hosted journal article supplement (doi:10.1101/gr.209361.116), 2016-12-07
Supplement: Supplemental_Table_S1.xlsx [file Supplemental_Table_S1.xlsx]

## Sheet: Sheet1
Supplementary Table S1
miRNA	Number of metazoan miRNA family members
let-7-5p	298
miR-1-3p	99
miR-10-5p	127
miR-100-5p	76
miR-101-3p	46
miR-103-3p	38
miR-106-5p	41
miR-107-3p	36
miR-122-5p	29
miR-124-3p	105
miR-126-3p	32
miR-1271-5p	11
miR-128-3p	37
miR-129-5p	38
miR-130-3p	72
miR-133-3p	112
miR-135-5p	62
miR-137-3p	56
miR-139-5p	25
miR-142-5p	29
miR-146-5p	52
miR-147-3p	27
miR-148-3p	47
miR-15-5p	79
miR-152-3p	23
miR-153-3p	50
miR-155-5p	26
miR-16-5p	55
miR-17-5p	36
miR-18-5p	59
miR-181-5p	104
miR-183-5p	40
miR-184-3p	70
miR-19-3p	76
miR-193-3p	62
miR-194-5p	37
miR-196-5p	65
miR-199-5p	31
miR-20-5p	58
mir-200-3p	84
mir-203-3p	29
mir-205-5p	39
mir-208-3p	27
miR-21-5p	36
mir-210-3p	56
mir-212-3p	15
mir-216-5p	59
mir-219-5p	72
miR-22-3p	49
mir-222-3p	35
miR-23-3p	72
miR-25-3p	30
miR-26-5p	56
miR-27-3p	76
miR-29-3p	117
mir-301-3p	47
miR-31-5p	75
mir-329-3p	15
miR-33-5p	56
miR-34-5p	115
miR-92-3p	151
mir-99-5p	44
