# Supplementary material for: Evolutionary patterns of metazoan microRNAs reveal targeting principles in the let-7 and miR-10 families
Source: HighWire-hosted journal article supplement (doi:10.1101/gr.209361.116), 2016-12-07
Supplement: Supplemental_Table_S2.xlsx [file Supplemental_Table_S2.xlsx]

## Sheet: Sheet1
	let-7c				miR-10b
Rank	Gene	Repression Index		Rank	Gene	Repression Index
1	HOXC8	0.319929		1	MAP4K5	0.3753
2	TRIM71	0.506327		2	L3MBTL3	0.391332
3	SIK1	0.510352		3	ERCC3	0.439548
4	APBB3	0.51346		4	SCML2	0.446755
5	NR6A1	0.523106		5	SMARCD2	0.49111
6	E2F5	0.524267		6	RBBP7	0.501671
7	LSM6	0.530148		7	ALDH1A3	0.510777
8	NEK3	0.556974		8	KLF10	0.515698
9	SUV39H2	0.559134		9	ALDH1A3	0.518886
10	DAPK1	0.567227		10	ADRB2	0.541847
11	ADRB2	0.570519		11	ZMYND11	0.543364
12	HAND1	0.574114		12	CBFB	0.546841
13	CREM	0.576081		13	ZNF766	0.555812
14	MED6	0.585594		14	THAP9	0.560692
15	GFI1	0.596868		15	FOXF2	0.564772
16	SCML2	0.597135		16	SDC1	0.566725
17	RBM12B	0.599413		17	MKRN2	0.567526
18	ZFHX2	0.599521		18	HOXD10	0.575598
19	TAF5	0.600882		19	HDAC8	0.583007
20	PITX3	0.601001		20	BAZ1B	0.587575
21	ZNF17	0.631094		21	TAF5L	0.588585
22	ZNF583	0.633296		22	KIT	0.589614
23	HMGB2	0.637248		23	EPHB2	0.595635
24	CDC25A	0.639035		24	TFAP2C	0.599115
25	RTCA	0.63996		25	CHD1	0.61062
26	MEIS2	0.641333		26	DAZAP1	0.614739
27	ZNF823	0.643781		27	ZNF879	0.617853
28	HBP1	0.644346		28	PNPT1	0.620206
29	RRN3	0.646527		29	TSC22D4	0.622197
30	CENPP	0.647		30	RB1CC1	0.622961
31	IRF9	0.648134		31	MED27	0.627337
32	LSM11	0.651829		32	DAPK1	0.631458
33	SETDB1	0.652347		33	ZNF333	0.63629
34	SREBF1	0.652829		34	WWP1	0.639633
35	TRIB1	0.653766		35	SSB	0.642724
36	CIC	0.653846		36	ZSWIM4	0.644231
37	ZNF626	0.657553		37	PCBD1	0.651049
38	PBX3	0.658453		38	ZC3H4	0.652474
39	HSF5	0.661435		39	MYT1	0.655575
40	ZNF341	0.662371		40	BCL6B	0.656322
41	ZNF200	0.664303		41	SMARCC2	0.656521
42	HMGA1	0.665164		42	HNRNPH3	0.657278
43	RPS6KA5	0.665763		43	KMT5A	0.657755
44	EPHB1	0.667522		44	SIAH2	0.657905
45	SSB	0.672304		45	TP63	0.663858
46	ID1	0.675383		46	RARG	0.67
47	LHX1	0.676238		47	STK16	0.670374
48	ZNF644	0.676488		48	HTATIP2	0.670681
49	MASTL	0.683217		49	ARID4B	0.674679
50	GSC	0.683382		50	HNRNPR	0.679839
51	THAP9	0.685022		51	ANXA7	0.680839
52	PAK4	0.685148		52	ZNF90	0.681916
53	MAF1	0.685469		53	DMTF1	0.684748
54	ZNF580	0.685488		54	CHD6	0.684858
55	BCL2L1	0.687968		55	HOXD1	0.685098
56	BHLHB9	0.69599		56	TCF15	0.685559
57	GSG2	0.696771		57	ZNF184	0.685828
58	ZNF483	0.697552		58	ZFP62	0.686834
59	ZNF410	0.698083		59	PSIP1	0.687006
60	FOXE1	0.701677		60	DKC1	0.687554
61	BCCIP	0.704125		61	KMT2D	0.687867
62	TRIB2	0.70419		62	PTF1A	0.689742
63	RFX6	0.706277		63	KDM3B	0.699055
64	MICB	0.706532		64	TBK1	0.699994
65	ZSCAN12	0.709786		65	ZNF479	0.700111
66	DLX2	0.713042		66	APTX	0.701679
67	TRIO	0.713457		67	ZNF580	0.705918
68	BRF2	0.715977		68	PKD1	0.706873
69	MCM4	0.716017		69	ZKSCAN4	0.707431
70	HSF1	0.717509		70	TRIM71	0.707927
71	RORB	0.721851		71	ZNF521	0.71056
72	ZNF442	0.721852		72	ZNF732	0.712404
73	HNRNPH3	0.723288		73	ZNF202	0.71392
74	RHOV	0.723372		74	PNO1	0.71547
75	NEUROG1	0.723626		75	SRC	0.716552
76	SPIC	0.72499		76	NEK6	0.716911
77	TBX1	0.725205		77	ALX1	0.717325
78	KMT5A	0.725499		78	MED17	0.717562
79	CNNM2	0.726485		79	GLIS2	0.718911
80	USF2	0.727831		80	HOXB2	0.719022
81	FYN	0.727886		81	MED14	0.719497
82	OLFM4	0.728471		82	LRRK2	0.72171
83	MED31	0.729139		83	ORC2	0.722111
84	MGMT	0.729166		84	GABPB2	0.722629
85	PA2G4	0.729441		85	CDIP1	0.722914
86	ALX1	0.729469		86	FOXR2	0.722954
87	ZNF655	0.730038		87	BRD2	0.725471
88	DNMT1	0.734572		88	MAP2K3	0.728523
89	ZC3H4	0.735179		89	ZNF626	0.729703
90	ZNF526	0.73748		90	SOX17	0.730849
91	MED7	0.738496		91	ZNF689	0.731235
92	SMAD6	0.739819		92	ZNF721	0.73211
93	ZNF343	0.739827		93	ZNF215	0.73457
94	CSTF2T	0.742715		94	MAP4K2	0.735608
95	MED24	0.744833		95	MBD3	0.736491
96	TBX10	0.746316		96	DCAF6	0.737521
97	ZNF530	0.748675		97	DDX5	0.738118
98	ETNK2	0.748727		98	ZNF644	0.738983
99	CREB3	0.749829		99	GCM2	0.739236
100	GMNN	0.749995		100	NCOR2	0.739648
101	SSX4	0.750911		101	NCOA1	0.739697
102	DBX2	0.752628		102	EPHB1	0.74207
103	ZNF189	0.75289		103	MED7	0.742146
104	ARID3A	0.753215		104	RPS6KA1	0.742669
105	DND1	0.753572		105	NR2E3	0.747254
106	ZNF287	0.753869		106	ZSCAN32	0.747474
107	LOC93349	0.754324		107	TRIB2	0.7483
108	PDK3	0.75433		108	RBP4	0.748324
109	KIT	0.754387		109	NCOA6	0.748919
110	EZH2	0.754996		110	TAF1A	0.753594
111	NR1I2	0.755057		111	ZFP42	0.754274
112	PKN3	0.755978		112	LRRK1	0.755157
113	RSF1	0.756715		113	ZFP36	0.756257
114	ZMAT5	0.757385		114	CRABP2	0.756625
115	GABPB2	0.757432		115	GFI1	0.758271
116	HHAT	0.761421		116	ZNF749	0.7606
117	CHD4	0.761527		117	ZNF135	0.760668
118	ZNF253	0.762177		118	TCF7	0.761968
119	PAK3	0.762605		119	ZNF345	0.762608
120	VPS72	0.763037		120	SRCAP	0.763001
121	MYCL	0.763734		121	TCF19	0.763319
122	SPDEF	0.769649		122	PATZ1	0.764615
123	EN2	0.772553		123	GRHL1	0.765088
124	ZNF736	0.773424		124	EWSR1	0.765176
125	PKNOX2	0.77625		125	RBM7	0.765682
126	DGKQ	0.7766		126	SIAH1	0.766007
127	CHD6	0.777703		127	NPR1	0.767242
128	HOXC11	0.778721		128	NCOA5	0.768327
129	SOX17	0.77954		129	NES	0.769747
130	DHX57	0.780645		130	BRD8	0.769897
131	TTF1	0.780956		131	NIP7	0.770192
132	RBM38	0.781086		132	HOXA5	0.770567
133	RNF7	0.782614		133	CTBP2	0.771691
134	NES	0.782687		134	EPHA6	0.772291
135	THRA	0.786084		135	SPI1	0.772387
136	ZNF571	0.786372		136	PSMD9	0.772765
137	LOC91461	0.786374		137	ZNF823	0.772886
138	ZNF202	0.786922		138	PIM3	0.772894
139	HNRNPF	0.787163		139	TRIB3	0.773278
140	HES5	0.790643		140	MELK	0.773518
141	CSRP2	0.790644		141	ZNF626	0.773619
142	ZNF44	0.791331		142	TRIO	0.774909
143	ZNF416	0.791586		143	OSR2	0.774972
144	ZNF687	0.791738		144	LOC93349	0.775252
145	BAZ1B	0.792537		145	RPS6KA5	0.776365
146	KAT5	0.793254		146	ZFYVE1	0.77748
147	MYT1	0.793462		147	ZNF596	0.780758
148	ZNF552	0.793739		148	FXR2	0.782239
149	TAB2	0.794092		149	BRSK1	0.783773
150	KLF10	0.794281		150	AKT1	0.784682
151	DYRK1B	0.794607		151	HOXD11	0.785319
152	HOXB7	0.794836		152	NOVA1	0.785558
153	WDR77	0.794841		153	RCOR3	0.787349
154	RIOK2	0.797253		154	T	0.787409
155	LRRK1	0.797421		155	NCOR1	0.787971
156	KLF1	0.797976		156	PBX3	0.789105
157	ZNF501	0.798628		157	NR0B2	0.790885
158	TBK1	0.800062		158	SMAD6	0.791967
159	NCOR1	0.80066		159	PTBP1	0.792316
160	ZNF19	0.800952		160	ASXL1	0.792356
161	TBP	0.801029		161	ROCK1	0.793372
162	E2F6	0.8		162	PRKCD	0.794405
				163	CHD3	0.795471
				164	ICAM1	0.796136
				165	SNX4	0.796178
				166	ZNF343	0.79627
				167	HNRNPAB	0.796684
				168	ZNF461	0.797787
				169	BNC1	0.799005
				170	ZNF532	0.800349
				171	NCOR1	0.802776
				172	CBX4	0.803678
				173	RBM17	0.805041
