# Supplementary material for: Evolutionary patterns of metazoan microRNAs reveal targeting principles in the let-7 and miR-10 families
Source: HighWire-hosted journal article supplement (doi:10.1101/gr.209361.116), 2016-12-07
Supplement: Supplemental_Table_S3.xlsx [file Supplemental_Table_S3.xlsx]

## Sheet: Sheet1
Table S3: Distribution of miR-10a, miR-10b, and miR-99a transcription embryonic mouse tissues at 9.5 days post coitus.
Embryonic Structure	mir-10a	mir-10b	miR-99a
HEAD
Neural Ectoderm
Brain	+		++
Surface Ectoderm
Optic placode	+		++
Mesoderm			+
Branchial Arches			++
BODY
Neural Ectoderm
Neural Tube -anterior	+		+
Neural Tube –posterior	+++	++	+
Surface Ectoderm
Otic Placode	+		++
Paraxial Mesoderm
Anterior Somites	++		++
Posterior Somites	+++	+++	++
Presomitic Mesoderm	+++	+++	++
Intermediate Mesoderm
Nephric Duct	+++	++	+++
Splanchnic Mesoderm
Heart			+
Somatic Mesoderm-anterior	+		+
Somatic Mesoderm-posterior	+++	+++	+
FORELIMB
Somatic Mesoderm	++	+	++
Surface Ectoderm	++	+	++
